# Supplementary material for: The impact of fruit maturation on bioactive microconstituents, inhibition of serum oxidation and inflammatory markers in stimulated PBMCs and sensory characteristics of Koroneiki virgin olive oils from Messenia, Greece
Source: Royal Society of Chemistry journal article supplement (doi:10.1039/c3fo60027k), 2013-01-01
Supplement: c3fo60027k.pdf [file c3fo60027k.pdf]

## Supplementary material

Target and qualifier ions for the trimethylsilyl ethers (TMS) of simple polyphenols, triterpenic acids and the internal standard (IS).

| Compound                       | Type              | Target ions | Qualifier ions |
|--------------------------------|-------------------|-------------|----------------|
| Vanillin                       | Phenol            | 194         | 209            |
| Cinnamic acid                  | Phenol            | 205         | 220            |
| Tyrosol                        | Phenol            | 179         | 267, 282       |
| Hydroxytyrosol                 | Phenol            | 209         | 267, 311       |
| <i>p</i> -Hydroxy-benzoic acid | Phenol            | 267         | 223, 193       |
| 3-(4-hydroxyphenyl)-1-propanol | Internal Standard | 206         | 191, 179       |
| Vanillic acid                  | Phenol            | 297         | 267, 312       |
| Homovanillic alcohol           | Phenol            | 326         | 267, 311       |
| <i>p</i> -Coumaric acid        | Phenol            | 308         | 293, 219       |
| Ferulic acid                   | Phenol            | 338         | 323, 308       |
| Caffeic acid                   | Phenol            | 396         | 219, 381       |
| Naringenin                     | Phenol            | 473         | 296            |
| Genistein                      | Phenol            | 473         |                |
| Kaempferol                     | Phenol            | 559         | 560            |
| Oleanolic acid                 | Terpenic acid     | 203         | 320, 482       |
| Ursolic acid                   | Terpenic acid     | 203         | 320, 482       |
| Maslinic acid                  | Terpenic acid     | 203         | 320            |
